# Supplementary material for: Prognostic Value and Immune Infiltration of ARMC10 in Pancreatic Adenocarcinoma Via Integrated Bioinformatics Analyses
Source: Research Square preprint supplement (doi:10.21203/rs.3.rs-936587/v1), 2021-10-12
Supplement: Supplementary file 1 [file 9618979eb5812ce64b6e16ca.docx]

**Supplement Table 6:** Univariate and multivariate survival results (Disease Specific Survival) of prognostic covariates in PAAD patients.

| Characteristics | Total(N) | Univariate analysis | |  | Multivariate analysis | |
| --- | --- | --- | --- | --- | --- | --- |
| Hazard ratio (95% CI) | P value | Hazard ratio (95% CI) | P value |
| T stage (T3&T4 vs. T1&T2) | 170 | 3.119 (1.346-7.229) | **0.008** |  | 1.921 (0.453-8.154) | 0.376 |
| N stage (N1 vs. N0) | 167 | 2.746 (1.473-5.121) | **0.001** |  | 2.790 (1.153-6.754) | **0.023** |
| M stage (M1 vs. M0) | 81 | 0.896 (0.212-3.777) | 0.881 |  |  |  |
| Pathologic stage (Stage II&Stage III&Stage IV vs. Stage I) | 169 | 3.249 (1.175-8.979) | **0.023** |  | 0.297 (0.041-2.132) | 0.227 |
| Radiation therapy (Yes vs. No) | 157 | 0.445 (0.238-0.834) | **0.011** |  | 0.293 (0.133-0.646) | **0.002** |
| Primary therapy outcome (CR&PR vs. PD&SD) | 135 | 0.283 (0.164-0.490) | **<0.001** |  | 0.342 (0.184-0.635) | **<0.001** |
| Gender (Male vs. Female) | 172 | 0.751 (0.473-1.194) | 0.227 |  |  |  |
| Race (White vs. Asian&Black or African American) | 169 | 1.429 (0.618-3.304) | 0.404 |  |  |  |
| Age (>65 vs. <=65) | 172 | 1.067 (0.670-1.701) | 0.784 |  |  |  |
| Residual tumor (R1&R2 vs. R0) | 158 | 1.861 (1.137-3.046) | **0.013** |  | 1.347 (0.746-2.434) | 0.323 |
| Histologic grade (G3&G4 vs. G1&G2) | 170 | 1.616 (0.994-2.628) | 0.053 |  | 1.742 (0.931-3.259) | 0.082 |
| Anatomic neoplasm subdivision (Other vs. Head of Pancreas) | 172 | 0.447 (0.234-0.854) | **0.015** |  | 0.542 (0.232-1.266) | 0.157 |
| ARMC10 (High vs. Low) | 172 | 2.560 (1.555-4.216) | **<0.001** |  | 2.681 (1.432-5.018) | **0.002** |
