# Supplementary material for: Prognostic Value and Immune Infiltration of ARMC10 in Pancreatic Adenocarcinoma Via Integrated Bioinformatics Analyses
Source: Research Square preprint supplement (doi:10.21203/rs.3.rs-936587/v1), 2021-10-12
Supplement: Supplementary file 2 [file eedd954bb5acf513a9cc73bd.docx]

**Supplement Table 7:** Univariate and multivariate survival results (Progression Free Interval) of prognostic covariates in PAAD patients

| Characteristics | Total(N) | Univariate analysis | |  | Multivariate analysis | |
| --- | --- | --- | --- | --- | --- | --- |
| Hazard ratio (95% CI) | P value | Hazard ratio (95% CI) | P value |
| T stage (T3&T4 vs. T1&T2) | 176 | 2.414 (1.309-4.452) | **0.005** |  | 1.303 (0.512-3.318) | 0.579 |
| N stage (N1 vs. N0) | 173 | 1.735 (1.113-2.705) | **0.015** |  | 1.601 (0.882-2.908) | 0.122 |
| M stage (M1 vs. M0) | 84 | 0.837 (0.300-2.336) | 0.734 |  |  |  |
| Pathologic stage (Stage II&Stage III&Stage IV vs. Stage I) | 175 | 2.966 (1.355-6.494) | **0.007** |  | 0.677 (0.181-2.531) | 0.562 |
| Radiation therapy (Yes vs. No) | 163 | 0.744 (0.474-1.168) | 0.199 |  |  |  |
| Primary therapy outcome (CR&PR vs. PD&SD) | 139 | 0.336 (0.216-0.524) | **<0.001** |  | 0.424 (0.258-0.696) | **<0.001** |
| Gender (Male vs. Female) | 178 | 0.968 (0.658-1.423) | 0.867 |  |  |  |
| Race (White vs. Asian&Black or African American) | 174 | 1.021 (0.530-1.967) | 0.949 |  |  |  |
| Age (>65 vs. <=65) | 178 | 1.256 (0.848-1.861) | 0.256 |  |  |  |
| Residual tumor (R1&R2 vs. R0) | 164 | 2.253 (1.494-3.398) | **<0.001** |  | 1.606 (0.989-2.609) | 0.056 |
| Histologic grade (G3&G4 vs. G1&G2) | 176 | 1.684 (1.114-2.546) | **0.013** |  | 1.518 (0.923-2.494) | 0.100 |
| Anatomic neoplasm subdivision (Other vs. Head of Pancreas) | 178 | 0.495 (0.299-0.820) | **0.006** |  | 0.507 (0.270-0.953) | **0.035** |
| ARMC10 (High vs. Low) | 178 | 2.246 (1.506-3.349) | **<0.001** |  | 2.063 (1.227-3.468) | **0.006** |
